# Supplementary material for: The Effectiveness of 0.6% Povidone Iodine Eye Drops in Reducing the Conjunctival Bacterial Load and Needle Contamination in Patients Undergoing Anti-VEGF Intravitreal Injection: A Prospective, Randomized Study
Source: PubMed Central journal article supplement (PMC6678890; doi:10.3390/jcm8071031), 2019-07-13
Supplement: jcm-08-01031-s001.pdf [file jcm-08-01031-s001.pdf]

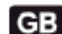

Sterile eye drops

10 ml amber glass bottle with dropper and screw cap

#### INSTRUCTIONS FOR USE

##### COMPOSITION

Medium-chain triglycerides (MCT), Sodium hyaluronate, Glycerol, Vitamin E TPGS, Potassium citrate, Sodium chloride, Citric acid monohydrate, Povidone-iodine 0,6%, Purified water.

##### PACKAGE

**IODIM®** 10 ml amber glass bottle with dropper and screw cap, containing sterile eye drops, supplied in a cardboard box.

##### CHARACTERISTICS AND HOW IT WORKS

**IODIM®** ophthalmic solution is supplied as a sterile isotonic solution, lipid based due to the presence of medium-chain Triglycerides (MCT). It also contains Sodium Hyaluronate (hydrophilic polymer), Glycerol (moistening agent), Vitamin E TPGS, Mineral salts and Povidone-iodine (preservative).

**IODIM®** contains MCTs, which interact with the outer lipid layer of the tear film and form a protective film that impedes the hyper-evaporation of the watery component of the tears; it contains sodium hyaluronate, which interacts mechanically with the mucinic layer of the tear film, retains the water and helps keep the surface of the eye stable for a long period of time. In fact, 2 instillations a day are sufficient to produce a feeling of comfort and to improve the condition of the eye surface. **IODIM®** also contains glycerol, which has a moistening effect, mineral salts (sodium, potassium, chloride and citrate), which have a nutritional function of the surface of the eye, besides regulating the pH and tear osmolarity, Vitamin E TPGS, which favours the wettability of the eye surface and Povidone-iodine, which ensures the sterility of the solution before and after opening the bottle.

##### INDICATIONS

**IODIM® stabilises the tear film and defends the surface of the eye in all cases of tear film disorders, present also in patients affected by recurrent eye infections.**

##### DOSAGE AND HOW TO USE

Remove the plastic safety seal on the neck of the bottle (Figure 1) and unscrew the cap (Figure 2).

- Tilt your head slightly back and pull down the lower lid of your eye with your index finger

to create a small pocket. Hold the dropper vertically with the tip pointing down above the eye (Figure 3).

- Look upward and squeeze lightly to instill 1 or 2 drops into the eye (Figure 4), 1 or 2 times a day, according to the doctor's instructions, then close your lids delicately for a few moments to ensure that the solution is evenly distributed over the surface of the eye.

##### STORAGE AND EXPIRATION

- Do not use the product after the expiration date marked on the box. Keep in the refrigerator at a temperature of between 2°C and 8°C.
- Keep away from light inside the cardboard box.
- Use within 28 days of opening, after which any remaining product must be discarded.

##### PRECAUTIONS/WARNINGS

- Wash your hands before using
- The product is for ophthalmic use only
- The product must be used by one patient only
- Do not use the product if, when opening for the first time, the packaging is open or appears to have been tampered with
- Keep out of reach of children
- Do not use if specifically hypersensitive to any of the components
- Do not inject the solution
- To avoid any contamination, do not touch any surfaces with the dropper and avoid any direct contact with the eyes
- If any undesired effects occur suspend the treatment and consult a doctor
- Do not instill simultaneously with other ophthalmic products because this might alter its effects; wait for at least 15 minutes in between instillations
- Do not use the product after the expiration date on the packaging
- Do not use with your contact lenses on
- Close the bottle well after use
- The expiration date is valid if the product is whole and properly stored
- Use in adults
- After instillation of the **IODIM®** product may occur a transient burning sensation or pricking

Figure S1: IODIM technical data.

# IODIM<sup>®</sup>

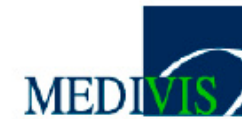

IODIM  
Long term stability (2-8°C)  
Batch n. SS049  
Manufacturing: 08/02/2016  
Start of stability: 23/02/2016

Table S1: IODIM long-term stability characteristics.

| TEST                  | SPECIFICATIONS                | Time (months) |         |         |         |         |         |         |         |
|-----------------------|-------------------------------|---------------|---------|---------|---------|---------|---------|---------|---------|
|                       |                               | 0             | 1       | 3       | 6       | 9       | 12      | 18      | 24      |
| Appearance            | Clear solution of brown color | Conform       | Conform | Conform | Conform | Conform | Conform | Conform | Conform |
| pH                    | 5.5-5.8                       | 5.7           | 5.7     | 5.7     | 5.6     | 5.7     | 5.6     | 5.6     | 5.7     |
| Osmolality            | (250-320) mosmol/kg           | 287           | 286     | 287     | 287     | 282     | 285     | 287     | 290     |
| Content of PVP iodine | 0.66-0.60 (%)                 | 0.64          | 0.64    | 0.63    | 0.63    | 0.63    | 0.64    | 0.61    | 0.60    |
| Sterility             | Conform to EP                 | Conform       | N/A     | N/A     | Conform | N/A     | Conform | N/A     | Conform |

In-use stability (2-8 °C)  
Batch n. SS049  
Manufacturing: 08/02/2016

Table S2: IODIM 0-8 weeks stability characteristics.

| Tests/Analysis time (weeks) | Specifications              | 0 (R)         | 14 days       | 4 weeks (A)   | 4 weeks (R)   | 6 weeks       | 8 weeks (A)   | 8 weeks (R)   |
|-----------------------------|-----------------------------|---------------|---------------|---------------|---------------|---------------|---------------|---------------|
| Appearance                  | Clear solution, brown color | Conform       | Conform       | Conform       | Conform       | Conform       | Conform       | Conform       |
| pH                          | 5.5-5.8                     | 5.6           | 5.7           | 5.7           | 5.7           | 5.7           | 5.7           | 5.7           |
| Osmolality                  | 250-320 mosmol/kg           | 287 mosmol/kg | 288 mosmol/kg | 284 mosmol/kg | 284 mosmol/kg | 290 mosmol/kg | 286 mosmol/kg | 285 mosmol/kg |
| Content of PVP iodine       | 0.66-0.60 (%)               | 0.63 mg/ml    | 0.62 mg/ml    | 0.62 mg/ml    | 0.62 mg/ml    | 0.63 mg/ml    | 0.63 mg/ml    | 0.63 mg/ml    |
| Sterility                   | Conform to EP               | Complies      | N/A           | N/A           | N/A           | N/A           | Complies      | Complies      |

Start of stability: 17/02/2016

R: Reference bottles; A: Actuated bottle
